# Supplementary material for: Sorptive removal of Remazol Brilliant Blue R from aqueous solution by diethylenetriamine functionalized magnetic macro-reticular hybrid material
Source: Royal Society of Chemistry journal article supplement (doi:10.1039/c5ra26508h), 2016-01-01
Supplement: c5ra26508h1.pdf [file c5ra26508h1.pdf]

## Supplementary Material

### **Sorptive removal of Remazol Brilliant Blue R from aqueous solution by diethylenetriamine functionalized magnetic macro-reticular hybrid material**

**K.Z. Elwakeel<sup>\*a</sup>, A.A. El-Bindary<sup>b</sup>, A. Ismail<sup>a</sup>, A.M. Morshidy<sup>c</sup>**

<sup>a</sup> Environmental Science Department, Faculty of Science, Port-Said University, Port-Said, Egypt

<sup>b</sup> Chemistry Department, faculty of Science, Damietta University, Damietta 34517, Egypt

<sup>c</sup> National Institute of Oceanography and Fisheries (NIOF), Baltim, Kafr Elsheikh, Egypt

---

\*Corresponding author: Fax: +20(0)1061694332.

E-mail address: [Khalid\\_elwakeel@yahoo.com](mailto:Khalid_elwakeel@yahoo.com) (K.Z. Elwakeel).

**Table SM1:** Kinetics models and their linear forms

| Kinetic model           | Non-Linear form                         | Linear form                                                          | Plot                       |
|-------------------------|-----------------------------------------|----------------------------------------------------------------------|----------------------------|
| Pseudo-First order      | $q_t = q_e [1 - e^{-k_1 t}]$            | $\log (q_e - q_t) = \log q_e - \left(\frac{k_1}{2.303}\right) t$     | $\log (q_e - q_t)$ vs. $t$ |
| Pseudo-Second order     | $q_t = \frac{k_2 t}{1 + k_2 q_e t}$     | $\frac{t}{q_t} = \frac{1}{k_2 q_e^2} + \left(\frac{1}{q_e}\right) t$ | $(t/q_t)$ vs. $t$          |
| Intraparticle diffusion | -                                       | $q_t = K_i t^{0.5} + X$                                              | $q_t$ vs. $t^{0.5}$        |
| Elovich equation        | $\frac{dq_t}{dt} = \alpha e^{-\beta q}$ | $q_t = \frac{1}{\beta} \ln \alpha \beta + \frac{1}{\beta} \ln t$     | $q_t$ vs. $\ln t$          |

**Table SM2:** Sorption isotherms and their linear forms

| Isotherm             | Non-Linear form                             | Linear form                                                                       | Plot                          |
|----------------------|---------------------------------------------|-----------------------------------------------------------------------------------|-------------------------------|
| Langmuir             | $q_e = \frac{q_{m,L} K_L C_e}{1 + K_L C_e}$ | $\frac{C_e}{q_e} = \frac{C_e}{q_{m,L}} + \frac{1}{K_L q_{m,L}}$                   | $\frac{C_e}{q_e}$ vs. $C_e$   |
| Freundlich           | $q_e = K_F C_e^{1/n}$                       | $\ln q_e = \ln K_f + \frac{1}{n} \ln C_e$                                         | $\ln q_e$ vs. $\ln C_e$       |
| Dubinin–Radushkevich | $q_e = Q_{DR} e^{-K_{DR} \varepsilon^2}$    | $\ln q_e = \ln Q_{DR} - K_{DR} \varepsilon^2$                                     | $\ln q_e$ vs. $\varepsilon^2$ |
| Temkin               | $q_e = \frac{RT}{b_T} [\ln(A_T C_e)]$       | $q_e = \left(\frac{RT}{b_T}\right) \ln A_T + \left(\frac{RT}{b_T}\right) \ln C_e$ | $q_e$ vs. $\ln C_e$           |

## Figures captions

**Figure SM1:** FT-IR spectra of the MCGMA macro-reticular sorbents.

**Figure SM2:** Removal % of RBBR by MCGMA-I and MCGMA-II as a function of pH.

**Figure SM3:** Modeling of uptake kinetics with: (a) PFORE, (b) PSORE.

**Figure SM4:** Modeling of uptake kinetics with (a) simplified model of resistance to intraparticle diffusion (Morris and Weber equation), (b) Elovich equation.

**Figure SM5:** Linearized plots for sorption isotherms: (a) Langmuir equation, (b) Freundlich equation.

**Figure SM6:** Linearized plots for sorption isotherms: (a) Dubinin–Radushkevich equation, Temkin model.

**Figure SM7:** van't Hoff plots for RBBR adsorption onto the MCGMA macro-reticular sorbents.

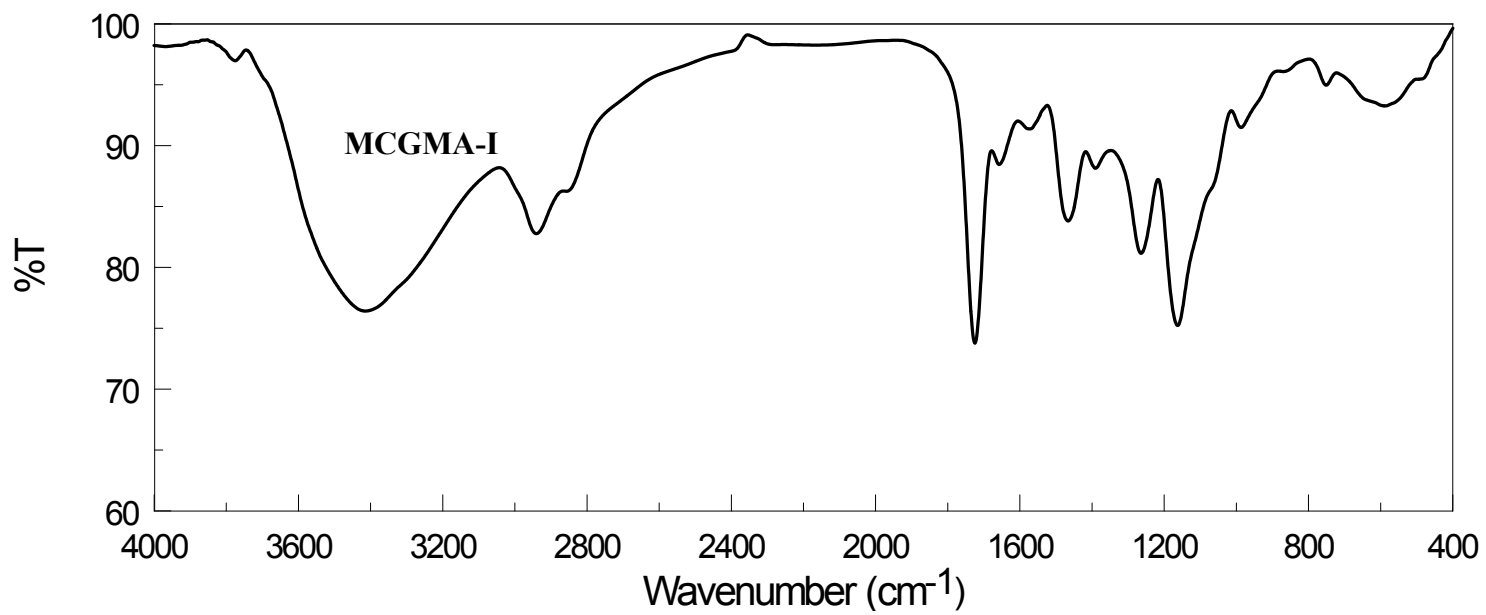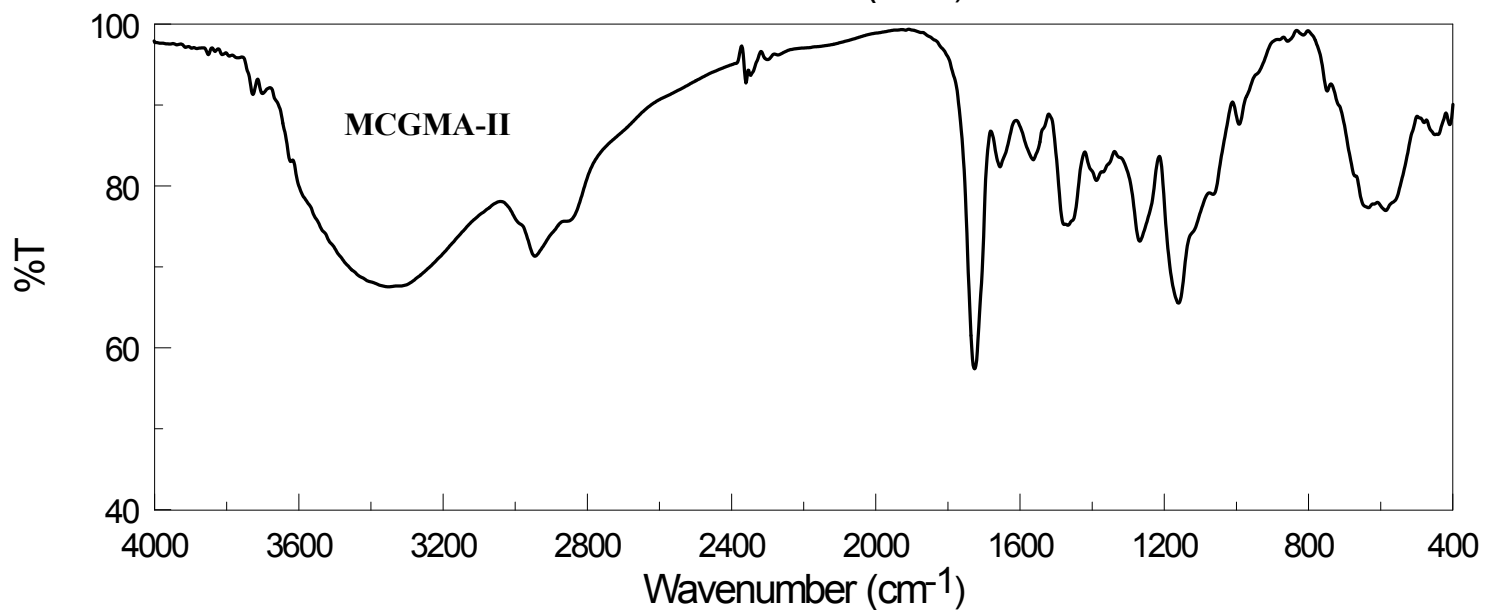

**Figure SM1**

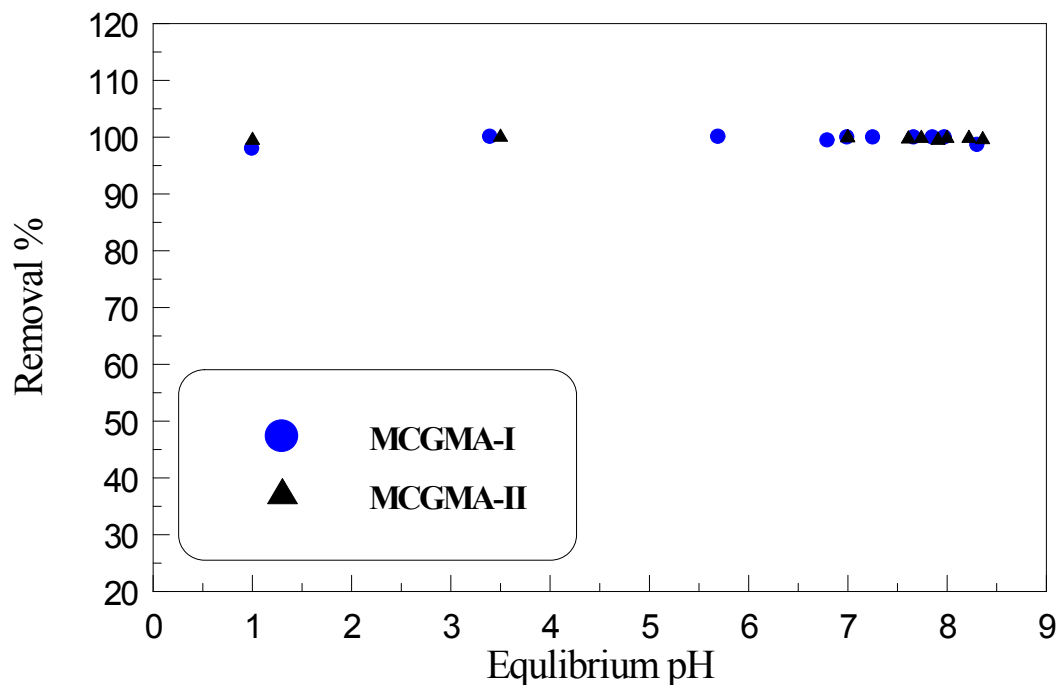

**Figure SM2**

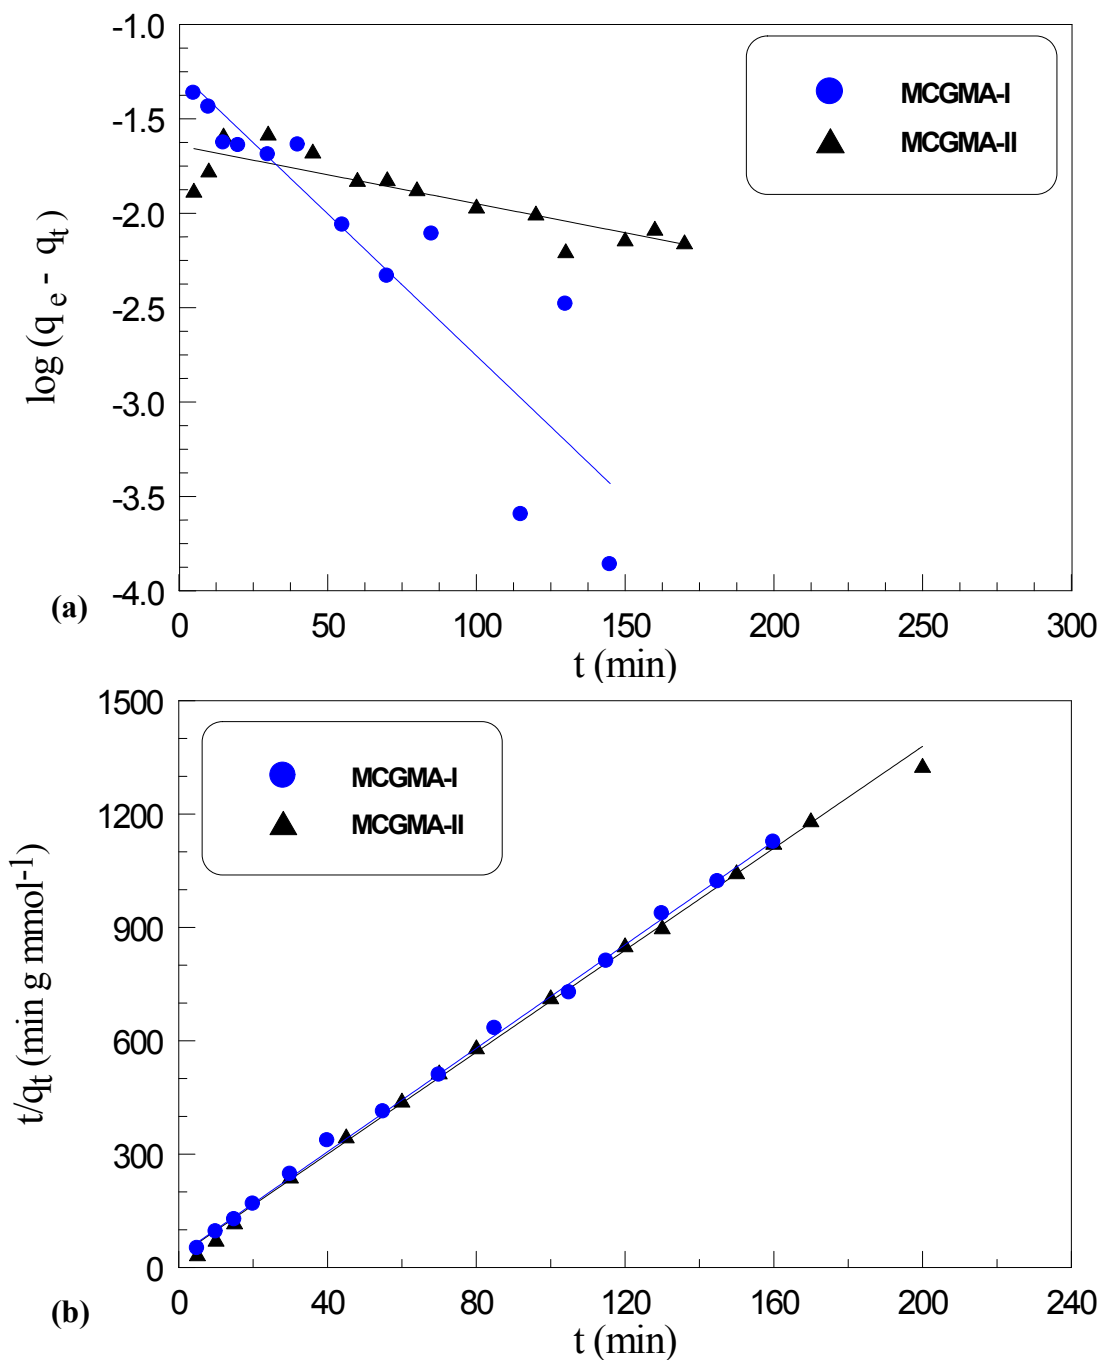

Figure SM3

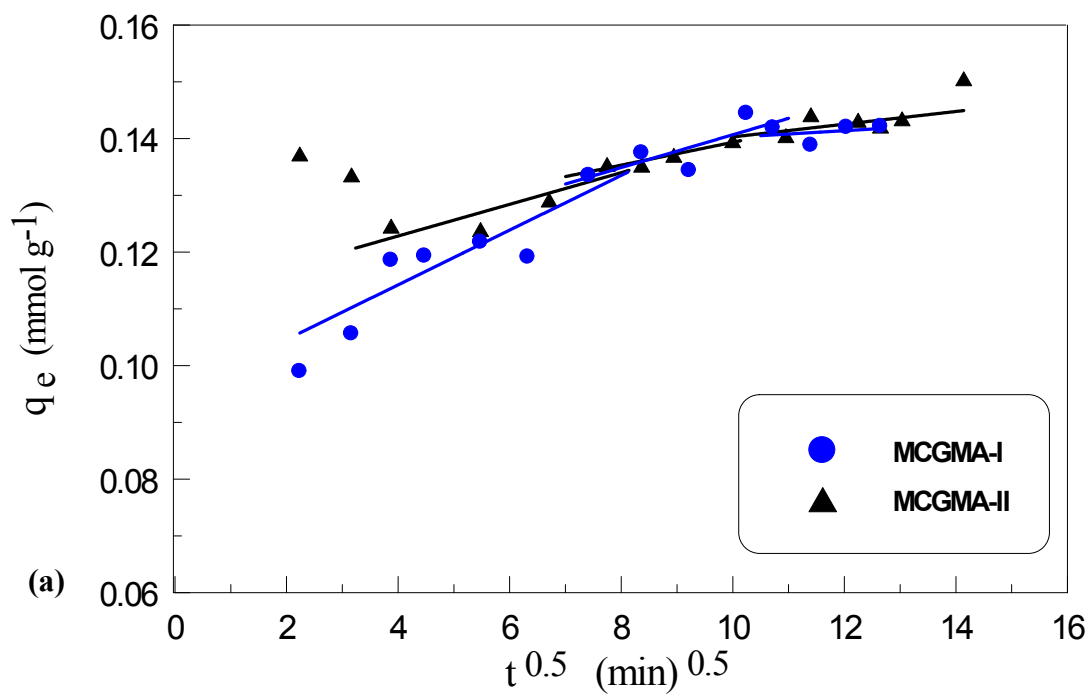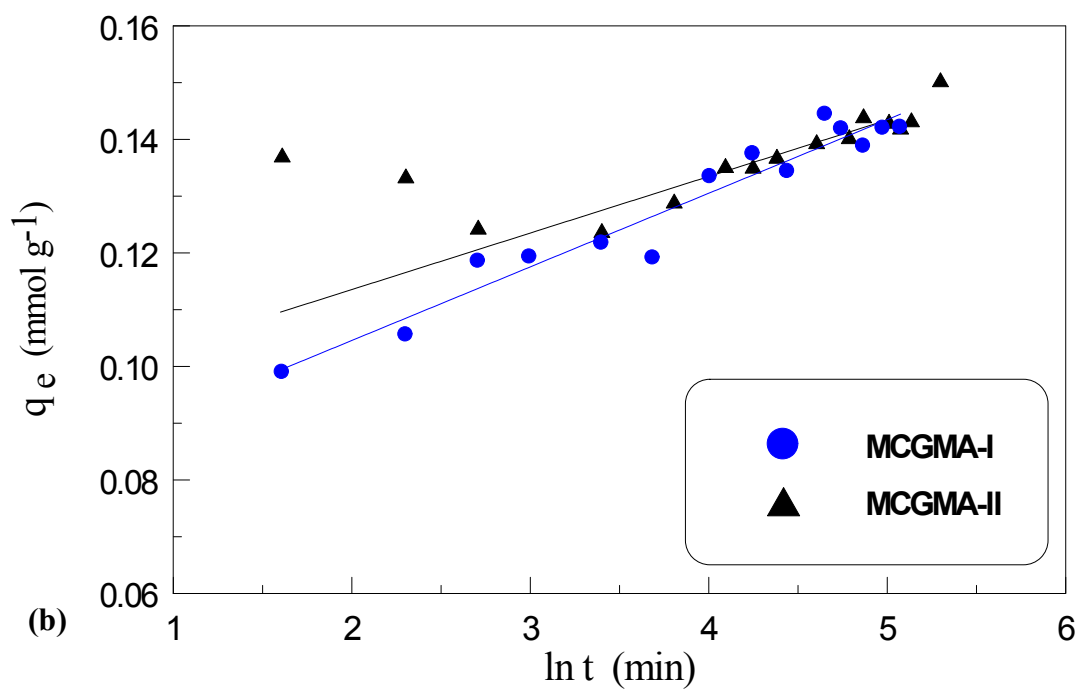

Figure SM4



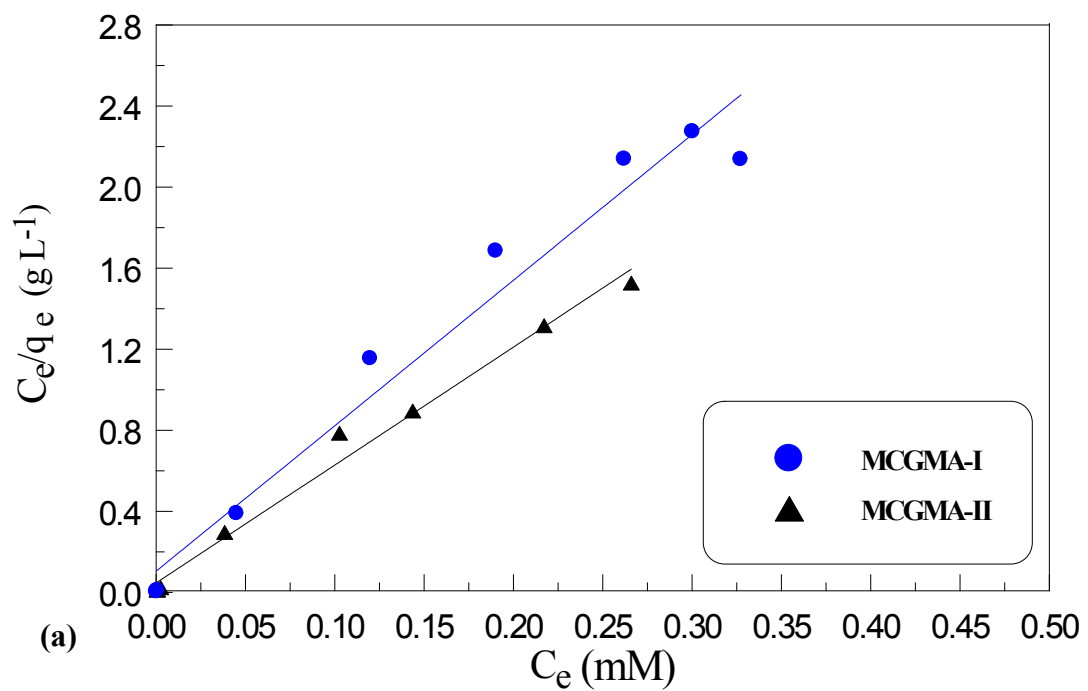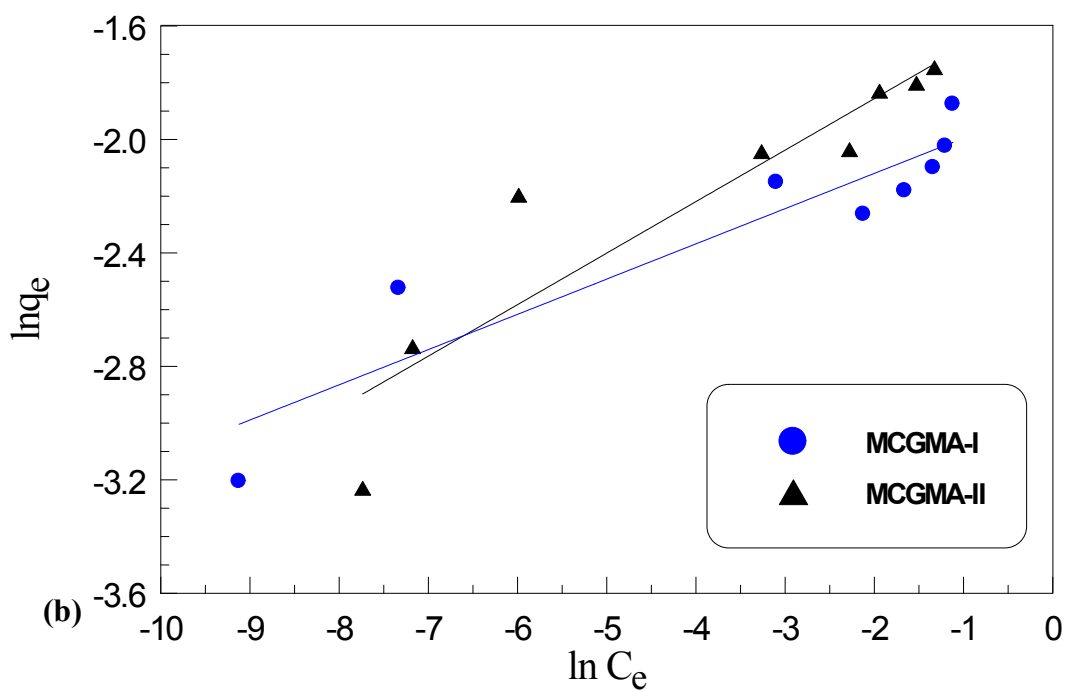

**Figure SM5**

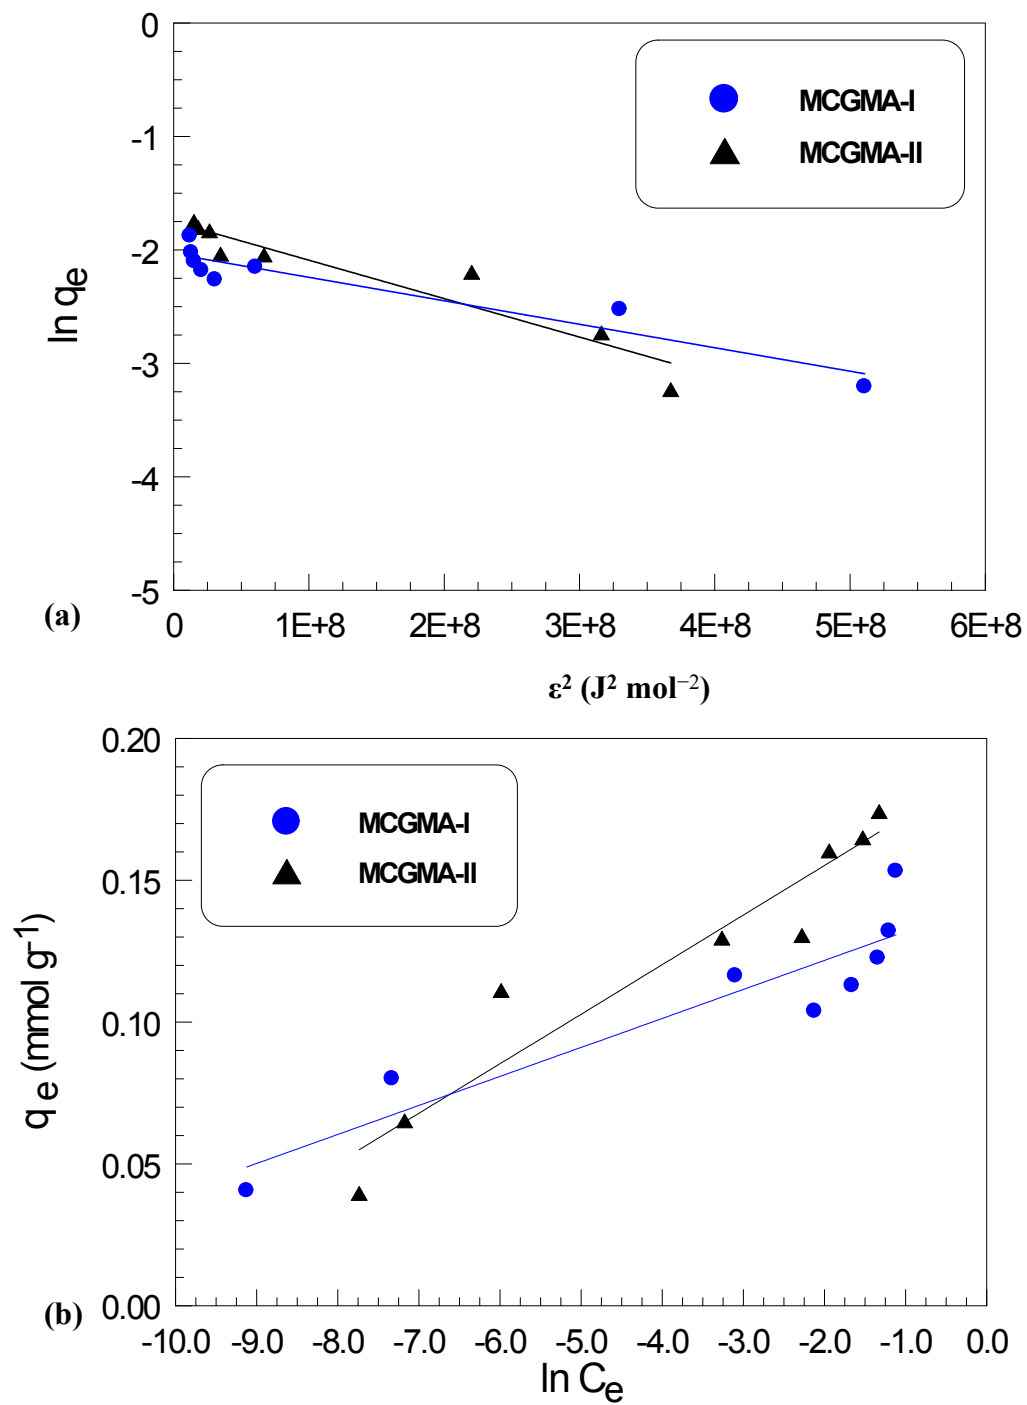

Figure SM6

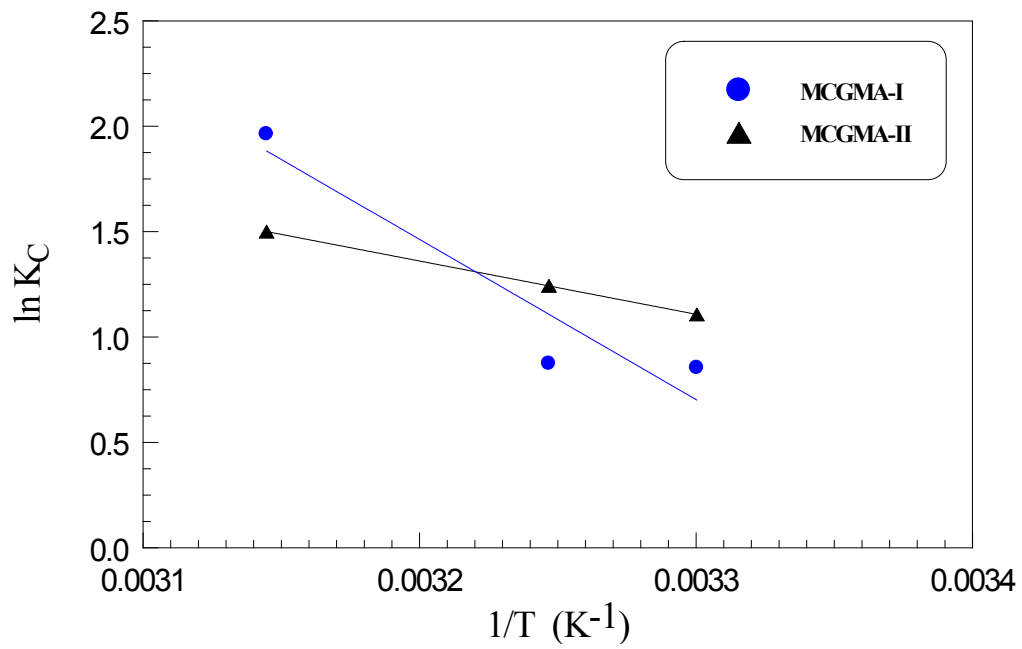

**Figure SM7**
